# Supplementary material
Source: HighWire-hosted journal article supplement (http://qhc.bmj.com/highwire/filestream/147403/field_highwire_adjunct_files/0/Appendix_1.pdf)
Supplement: Appendix_1.pdf [file Appendix_1.pdf]

**Appendix 1. Questionnaire used to interview staff involved in a missed RRS call**

**Interview ID:**

Patient currently meeting RRS criteria  Patient previously fulfilled RRS criteria

Primary Nurse  Nurse in charge  Intern  Resident  Registrar

**How concerned were/are you about this patient?**

Not at all concerned  Slightly concerned  Quite concerned  Very concerned

**Did you think this patient meets/was meeting RRS criteria?**  Yes  No

(If No, ask what RRS criteria they/their ward are using, may answer yes, BUT.....)

**What did you think was going to happen/will happen in the 2 hours following this set of observations?**

Deteriorate  Stay the same  Improve  Improve with treatment

**In 1 sentence what would your colleagues think if you had called a RRS or called a RRS on this patient right now?**

• Nursing staff:

• Medical staff:
